# Supplementary material for: The impact of different spirometric definitions on the prevalence of airway obstruction and their association with respiratory symptoms
Source: PubMed Central journal article supplement — ERJ Open Res. 2017 Dec 8;3(4):00110-2017. doi: 10.1183/23120541.00110-2017 (PMC5722078; doi:10.1183/23120541.00110-2017), 2017-12-08
Supplement: 00110-2017_supplementary_tables.pdf [file 00110-2017_supplementary_tables.pdf]

## SUPPLEMENTAL MATERIAL

**Table S1.** Baseline characteristics of the total sample and subgroups of healthy population, fixed-ratio-only and lower limit of normal-defined airway obstruction.

| Patient characteristics      | Total sample<br>(n=10,329) | Healthy<br>individuals#<br>(n=8,475) | Fixed ratio only<br>(FR-only)<br>(n=912) | Lower limit of<br>normal<br>(LLN)<br>(n=946) | P-values                      |                       |                       |
|------------------------------|----------------------------|--------------------------------------|------------------------------------------|----------------------------------------------|-------------------------------|-----------------------|-----------------------|
|                              |                            |                                      |                                          |                                              | Healthy<br>vs.<br>FR-<br>only | Healthy<br>vs.<br>LLN | FR-only<br>vs.<br>LLN |
| <b>Sex (male), No. (%)</b>   | 5,849 (48%)                | 4,067 (48%)                          | 531 (58%)                                | 407 (43%)                                    | <b>&lt;0.001</b>              | 0.004                 | <b>&lt;0.001</b>      |
| <b>Age, mean (SD)</b>        | 58.4 (9.6)                 | 57.5 (9.4)                           | 65.2 (7.4)                               | 59.4 (9.5)                                   | <b>&lt;0.001</b>              | <b>&lt;0.001</b>      | <b>&lt;0.001</b>      |
| <b>Body Mass Index (BMI)</b> |                            |                                      |                                          |                                              |                               |                       |                       |
| Overall, mean (SD)           | 26.6 (4.4)                 | 26.7 (4.4)                           | 26.5 (4.1)                               | 25.6 (4.4)                                   | 0.13                          | <b>&lt;0.001</b>      | <b>&lt;0.001</b>      |
| Underweight, n (%)           | 85 (1)                     | 56 (1)                               | 5 (1)                                    | 18 (2)                                       | 0.83                          | <b>&lt;0.001</b>      | 0.01                  |
| Normal weight, n (%)         | 4,320 (38)                 | 3,116 (37)                           | 350 (38)                                 | 444 (47)                                     | 0.39                          | <b>&lt;0.001</b>      | <b>&lt;0.001</b>      |
| Overweight, n (%)            | 4,868 (43)                 | 3,674 (44)                           | 394 (43)                                 | 344 (36)                                     | 0.85                          | <b>&lt;0.001</b>      | 0.003                 |
| Obese, n (%)                 | 2,097 (18)                 | 1,574 (19)                           | 161 (18)                                 | 137 (15)                                     | 0.46                          | 0.002                 | 0.06                  |
| <b>Smoking, n (%)</b>        |                            |                                      |                                          |                                              |                               |                       |                       |
| Current smoking              | 2,273 (20)                 | 1,354 (16)                           | 260 (29)                                 | 420 (45)                                     | <b>&lt;0.001</b>              | <b>&lt;0.001</b>      | <b>&lt;0.001</b>      |
| Former smoking               | 4,262 (37)                 | 3,132 (37)                           | 376 (41)                                 | 334 (36)                                     | 0.016                         | 0.31                  | 0.01                  |
| Never smoking                | 4,842 (43)                 | 3,926 (47)                           | 273 (30)                                 | 186 (20)                                     | <b>&lt;0.001</b>              | <b>&lt;0.001</b>      | <b>&lt;0.001</b>      |
| <b>Pack-years, mean (SD)</b> | 19.2 (18.0)                | 16.9 (16.3)                          | 25.1 (20.1)                              | 27.6 (20.8)                                  | <b>&lt;0.001</b>              | <b>&lt;0.001</b>      | 0.02                  |

# All individuals with LLN-AO had also FR-AO. The number of individuals with FR-AO only was 912. Thus, the comparison between the groups; healthy individuals (n=8,475), FR-AO only (n=912), and LLN-AO (n=946). The percentages are for available data and not the total number.

P-values < 0.0015 are emphasised in bold as they meet significance after Bonferroni correction for multiple comparisons.

**Table S2.** Associations between airway obstruction defined by fixed ratio and lower limit of normal and clinical outcomes.

|                         | Model 1                       |                                       |                                       | Model 2                                      |
|-------------------------|-------------------------------|---------------------------------------|---------------------------------------|----------------------------------------------|
|                         | Airway obstruction            |                                       |                                       | Airway obstruction                           |
|                         | Healthy individuals (n=8,475) | Fixed ratio (n=1,854)                 | Lower limit of normal (n=946)         | FR+/LLN- (n=912) (ref.) vs. FR+/LLN+ (n=942) |
| Shortness of breath     | N (%)<br>OR (95% CI)          | N (%)<br>OR (95% CI)                  | N (%)<br>OR (95% CI)                  | Ref. (%) vs. LLN (%)<br>OR (95% CI)          |
| - at rest               | 180 (2.1)<br><b>1.00</b>      | 66 (3.6)<br><b>1.62 (1.19-2.18)</b>   | 44 (4.7)<br><b>2.05 (1.45-2.89)</b>   | (2.4) vs. (4.7)<br><b>1.77 (1.04-2.99)</b>   |
| - during daily activity | 52 (0.6)<br><b>1.00</b>       | 33 (1.8)<br><b>2.49 (1.58-3.93)</b>   | 22 (2.3)<br><b>3.46 (2.07-5.77)</b>   | (1.2) vs. (2.3)<br>1.85 (0.88-3.89)          |
| - during exercise       | 849 (10.1)<br><b>1.00</b>     | 359 (19.5)<br><b>2.02 (1.75-2.32)</b> | 229 (24.4)<br><b>2.74 (2.31-3.25)</b> | (14.4) vs. (24.5)<br><b>2.10 (1.62-2.73)</b> |
| Chronic cough           | 529 (6.3)<br><b>1.00</b>      | 285 (15.6)<br><b>2.42 (2.06-2.84)</b> | 185 (19.9)<br><b>3.23 (2.67-3.90)</b> | (11.3) vs. (19.8)<br><b>1.90 (1.43-2.51)</b> |
| Chronic phlegm          | 369 (4.4)<br><b>1.00</b>      | 211 (11.5)<br><b>2.41 (2.01-2.91)</b> | 141 (15.1)<br><b>3.28 (2.64-4.07)</b> | (7.7) vs. (15.1)<br><b>2.04 (1.48-2.82)</b>  |
| Chronic bronchitis      | 232 (2.8)<br><b>1.00</b>      | 146 (8.0)<br><b>2.67 (2.13-3.33)</b>  | 101 (10.8)<br><b>3.65 (2.85-4.68)</b> | (5.0) vs. (10.8)<br><b>2.19 (1.49-3.22)</b>  |
| Nocturnal awakening     | 589 (7.0)<br><b>1.00</b>      | 162 (8.7)<br><b>1.21 (1.00-1.46)*</b> | 97 (10.3)<br><b>1.44 (1.14-1.82)</b>  | (7.1) vs. (10.3)<br><b>1.45 (1.03-2.03)</b>  |
| Wheeze                  | 305 (3.6)<br><b>1.00</b>      | 215 (11.7)<br><b>3.08 (2.53-3.73)</b> | 151 (16.1)<br><b>4.29 (3.44-5.34)</b> | (7.1) vs. (16.2)<br><b>2.48 (1.78-3.44)</b>  |

Multiple logistic regression analysis adjusted for age (as a dichotomous variable dividing the study sample at <60 years and ≥60 years, sex, ever-smoking and BMI. Chronic bronchitis defined according to ERS/ATS guidelines. Daily activities: cleaning and dressing. \*P-value=0.044.

---

**Table S3.** Severity of airway obstruction according to different staging systems.

|                   | GOLD (N=1,854) |                                          | ATS/ERS 2005 (N=946) |                                          | Quanjer 2014 (N=946) |                                          |
|-------------------|----------------|------------------------------------------|----------------------|------------------------------------------|----------------------|------------------------------------------|
| Staging           | N (% of total) | N (% of stage) with respiratory symptoms | N (% of total)       | N (% of stage) with respiratory symptoms | N (% of total)       | N (% of stage) with respiratory symptoms |
| Mild              | 1,045 (56%)    | 283 (27%)                                | 604 (64%)            | 194 (32%)                                | 628 (66%)            | 204 (32%)                                |
| Moderate          | 704 (38%)      | 352 (50%)                                | 163 (17%)            | 91 (56%)                                 | 122 (13%)            | 73 (60%)                                 |
| Moderately severe | N/A            | N/A                                      | 87 (9%)              | 57 (66%)                                 | 102 (11%)            | 67 (66%)                                 |
| Severe            | 90 (5%)        | 76 (85%)                                 | 59 (7%)              | 48 (82%)                                 | 74 (8%)              | 58 (78%)                                 |
| Very severe       | 15 (1%)        | 13 (87%)                                 | 27 (3%)              | 26 (96%)                                 | 20 (2%)              | 19 (95%)                                 |
